# Supplementary material for: Significance of pancreatic duodenal homeobox-1 (PDX-1) genetic polymorphism in insulin secretion in Japanese patients with type 2 diabetes
Source: HighWire-hosted journal article supplement (doi:10.1136/bmjdrc-2022-002908), 2022-09-01
Supplement: bmjdrc-2022-002908supp001_data_supplement.pdf [file bmjdrc-2022-002908supp001_data_supplement.pdf]

## Supplemental figure 1

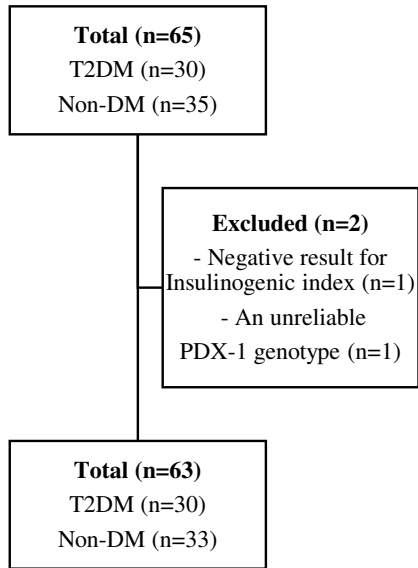

Supplemental figure 1

Subject selection flow chart.

Non-DM, non-diabetes mellitus; T2DM, type 2 diabetes mellitus.
