# Supplementary material for: Significance of pancreatic duodenal homeobox-1 (PDX-1) genetic polymorphism in insulin secretion in Japanese patients with type 2 diabetes
Source: HighWire-hosted journal article supplement (doi:10.1136/bmjdrc-2022-002908), 2022-09-01
Supplement: bmjdrc-2022-002908supp002_data_supplement.pdf [file bmjdrc-2022-002908supp002_data_supplement.pdf]

Supplemental Table 1. Multivariable linear regression analysis of *PDX-1*

|            | HOMA-beta ( $R^2=0.36$ , $p<0.0001$ )                |         | Insulin AUC ( $R^2=0.34$ , $p<0.0001$ )              |         |
|------------|------------------------------------------------------|---------|------------------------------------------------------|---------|
|            | Standardized partial regression coefficient (95% CI) | P value | Standardized partial regression coefficient (95% CI) | P value |
| Risk PDX-1 | 2.715 (-67.81 to -10.27)                             | 0.0087  | 2.034 (-336.3 to -2.720)                             | 0.0465  |
| Age        | 5.092 (-3.230 to -1.407)                             | <0.0001 | 2.622 (-12.20 to -1.639)                             | 0.0111  |
| Gender     | 1.394 (-7.942 to 44.43)                              | 0.1685  | 0.4671 (-116.4 to 187.2)                             | 0.6421  |
| BMI        | 3.056 (1.769 to 8.481)                               | 0.0034  | 5.175 (30.87 to 69.78)                               | <0.0001 |

A multivariable linear regression model was used to analyze the differences in insulin secretion due to difference in *PDX-1* genotype after adjusting for age, sex, and BMI.
